# Supplementary material for: Therapeutic Potentials of Secoiridoids from the Fruits of Ligustrum lucidum Aiton against Inflammation-Related Skin Diseases
Source: MDPI journal article supplement (doi:10.3390/ph15080932), 2022-07-27
Supplement: s1 [file s1]

# Therapeutic Potentials of Secoiridoids from the Fruits of *Ligustrum lucidum* Aiton against Inflammation-Related Skin Diseases

Sang Won Yeon <sup>1,†</sup>, Su Ryeon Choi <sup>2,†</sup>, Qing Liu <sup>3,†</sup>, Yang Hee Jo <sup>1</sup>, Da Hee Choi <sup>2</sup>, Mi Ran Kim <sup>2</sup>, Se Hwan Ryu <sup>1</sup>, Solip Lee <sup>1</sup>, Bang Yeon Hwang <sup>1</sup>, Hyung Seo Hwang <sup>2,\*</sup> and Mi Kyeong Lee <sup>1,\*</sup>

<sup>1</sup> College of Pharmacy, Chungbuk National University, Cheongju 28160, Korea; sangwon1311@naver.com (S.W.Y.); qow0125@naver.com (Y.H.J.); alfm0188@naver.com (S.H.R.); dudaos000@hanmail.net (S.L.); byhwang@chungbuk.ac.kr (B.Y.H.)

<sup>2</sup> School of Cosmetic Science and Beauty Biotechnology, Semyung University, Jecheon 27136, Korea; tryu0925@naver.com (S.R.C.); chlekgml930@gmail.com (D.H.C.); alfks4050@naver.com (M.R.K.)

<sup>3</sup> Food and Pharmacy College, Xuchang University, Xuchang 461000, China; liuqing7115@hotmail.com

\* Correspondence: hshwang@semyung.ac.kr (H.S.H.); mkleee@chungbuk.ac.kr (M.K.L.)

† These authors contributed equally to this work.

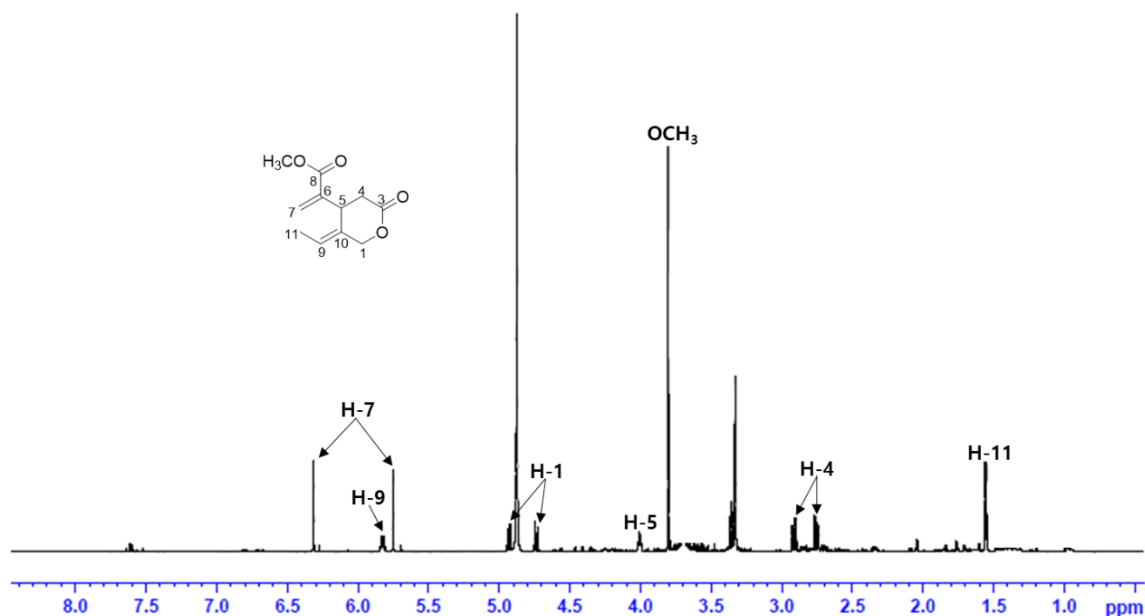

Figure S1. <sup>1</sup>H NMR spectrum of compound 1.

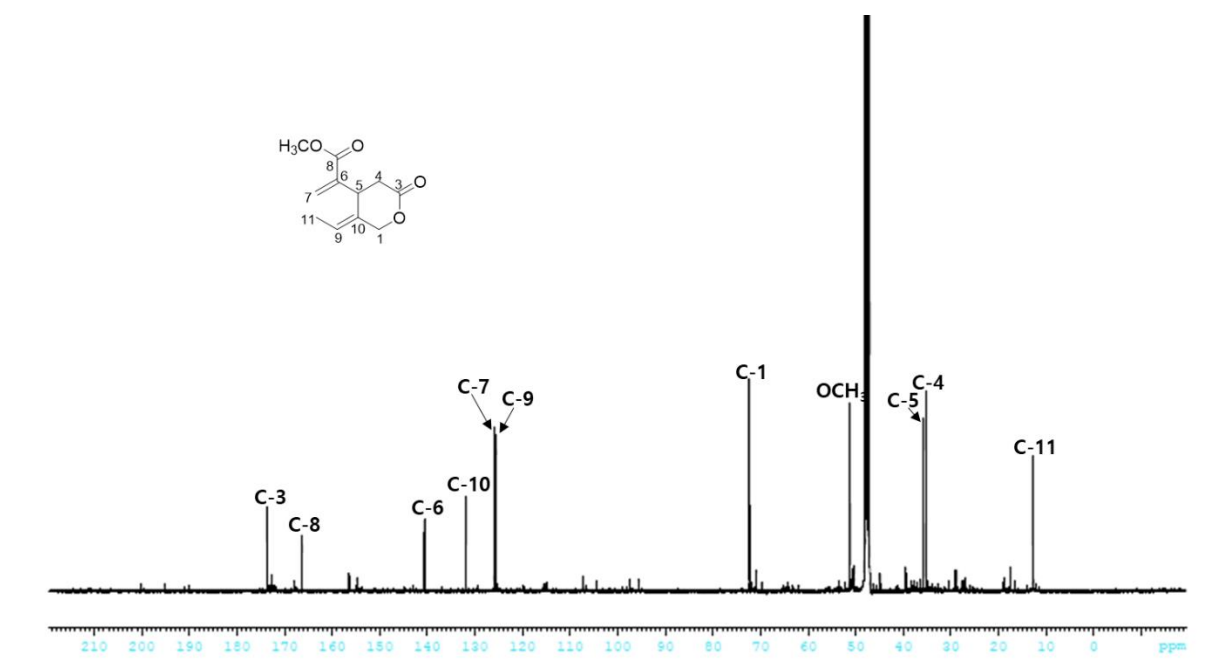

**Figure S2.**  $^{13}\text{C}$  NMR spectrum of compound 1.

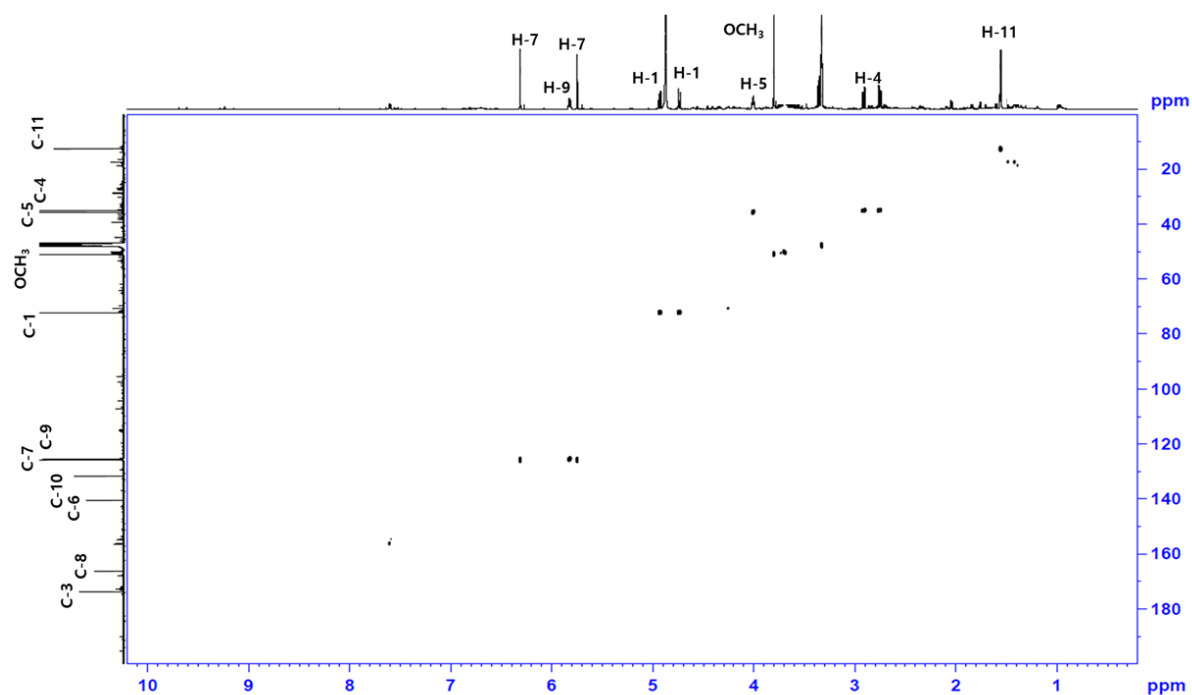

Figure S3. HSQC spectrum of compound 1.

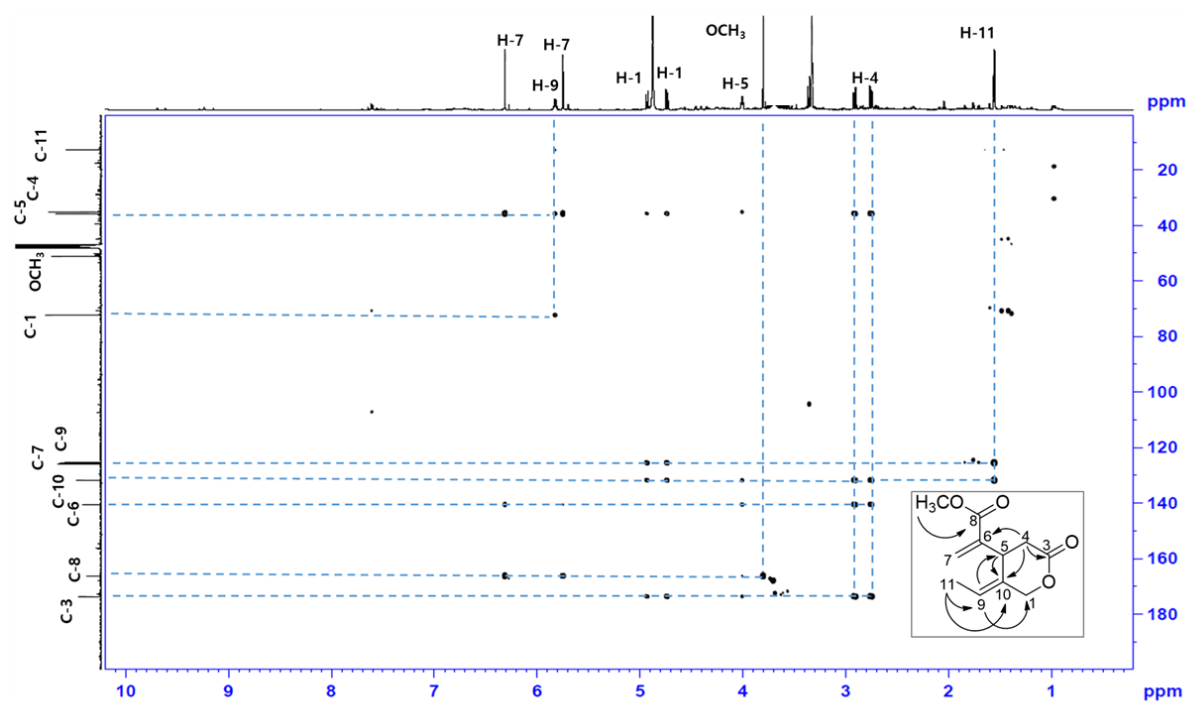

Figure S4. HMBC spectrum of compound 1.

[A]

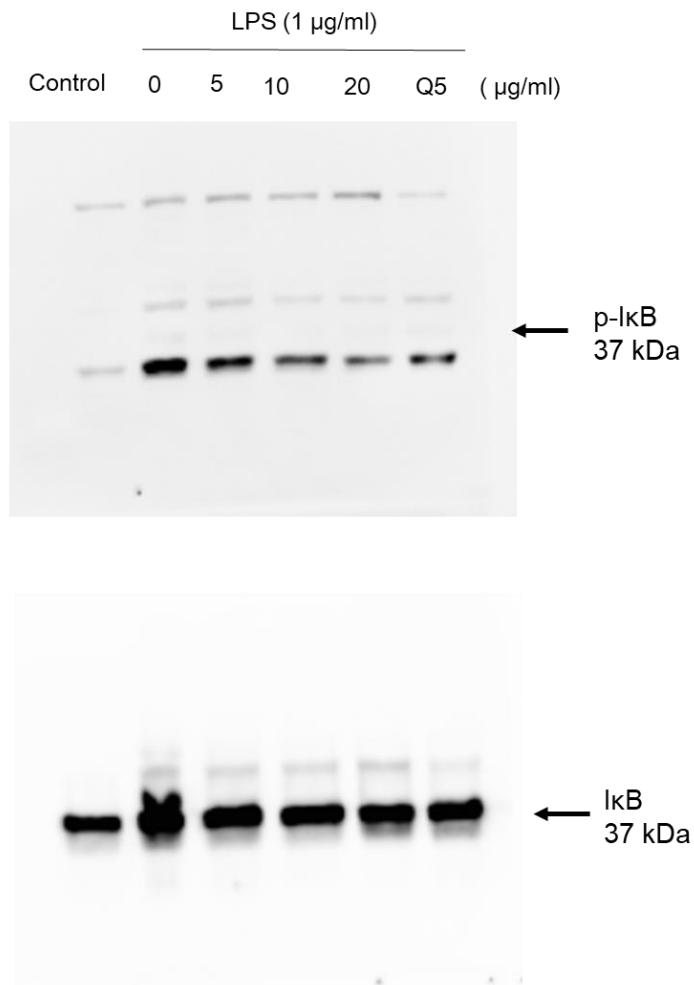

**Figure S5.** Western blots for the IkB phosphorylation in the NF- $\kappa$ B signaling pathway in LPS induced RAW 264.7 cells (Figure 4 in the manuscript).

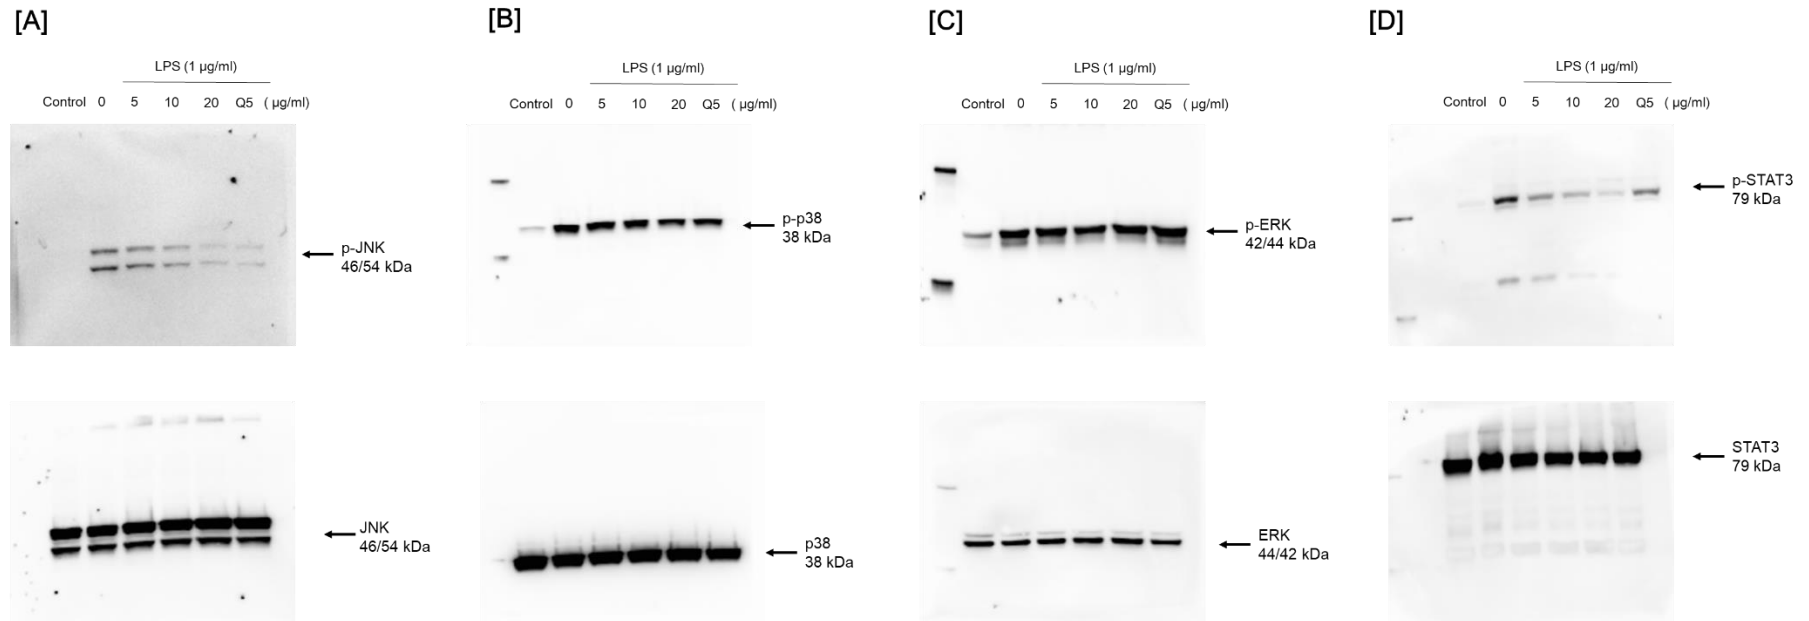

**Figure S6.** Western blots for the phosphorylation of MAPK and STAT3 in LPS induced RAW 264.7 cells (Figure 5 in the manuscript).

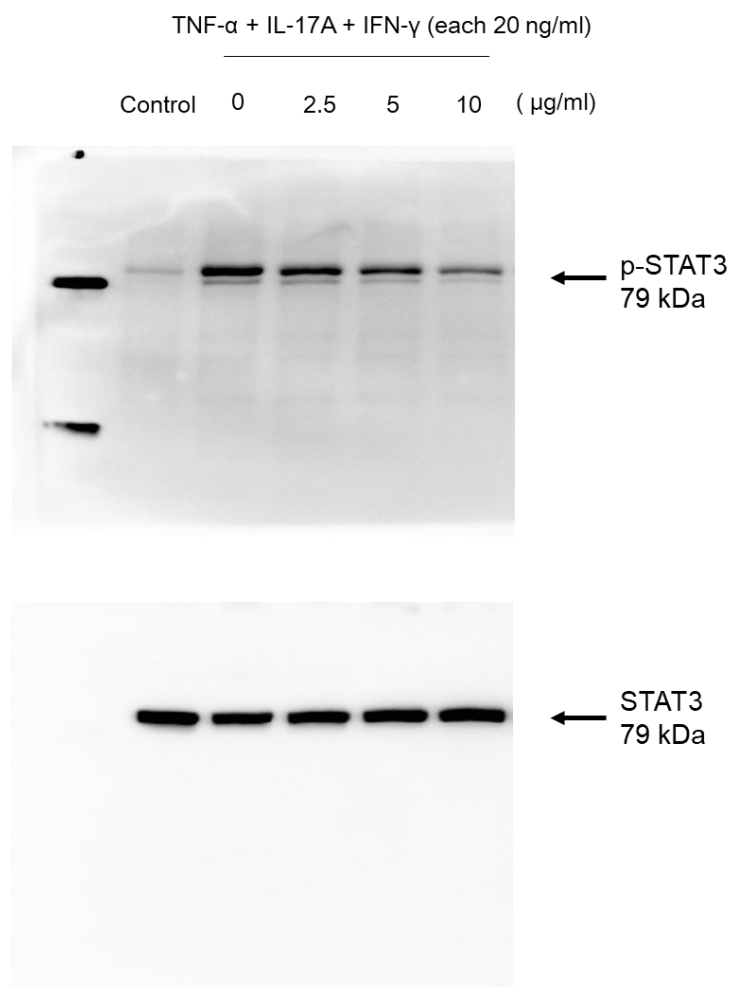

**Figure S7.** Western blots for the I $\kappa$ B phosphorylation in the NF- $\kappa$ B signaling pathway in TNF- $\alpha$  /IL-17A/ IFN- $\gamma$  induced HaCaT cells. (Figure 6 in the manuscript).
